# Supplementary material for: Characterisation of gene and pathway expression in stabilised blood from children with coeliac disease
Source: HighWire-hosted journal article supplement (doi:10.1136/bmjgast-2020-000536), 2020-12-01
Supplement: bmjgast-2020-000536supp002_data_supplement.pdf [file bmjgast-2020-000536supp002_data_supplement.pdf]

**Supplementary File 2** Differentially expressed genes (p-value < 0.05, no adjustment for multiple testing), with FC < -1.5 or FC > 1.5 (logFC 0.58) between groups CDM3, M0, and CDM0.

### CDM3vsM0

| Gene ID   | Length | Entrez ID | Name                                                    | logFC | AveExpr | t    | p-value |
|-----------|--------|-----------|---------------------------------------------------------|-------|---------|------|---------|
| LRRC37A4P | 6924   | 55073     | leucine rich repeat containing 37 member A4, pseudogene | 1,69  | 2,94    | 3,02 | 0,0052  |
| TNNT1     | 2171   | 7138      | troponin T1, slow skeletal type                         | 1,59  | 0,69    | 2,72 | 0,011   |
| SIGLEC1   | 7886   | 6614      | sialic acid binding Ig like lectin 1                    | 1,58  | 1,86    | 2,20 | 0,035   |
| ISG15     | 942    | 9636      | ISG15 ubiquitin-like modifier                           | 1,56  | 3,36    | 2,10 | 0,044   |
| IFI44L    | 10240  | 10964     | interferon induced protein 44 like                      | 1,42  | 6,87    | 2,15 | 0,040   |
| OAS3      | 8251   | 4940      | 2'-5'-oligoadenylate synthetase 3                       | 1,37  | 5,74    | 2,70 | 0,011   |
| USP18     | 2129   | 11274     | ubiquitin specific peptidase 18                         | 1,36  | 0,97    | 2,16 | 0,039   |
| IFITM3    | 1348   | 10410     | interferon induced transmembrane protein 3              | 1,35  | 3,98    | 2,33 | 0,027   |
| LY6E      | 2640   | 4061      | lymphocyte antigen 6 family member E                    | 1,33  | 3,09    | 2,78 | 0,0093  |
| JUP       | 4942   | 3728      | junction plakoglobin                                    | 1,25  | 1,37    | 2,43 | 0,021   |
| D2HGDH    | 5279   | 728294    | D-2-hydroxyglutarate dehydrogenase                      | 1,12  | 1,59    | 3,27 | 0,0027  |
| CATSPERG  | 9190   | 57828     | cation channel sperm associated auxiliary subunit gamma | 1,09  | 1,61    | 4,34 | 0,00015 |
| TCN2      | 3122   | 6948      | transcobalamin 2                                        | 1,09  | 1,05    | 2,33 | 0,027   |
| ZDHC8     | 5542   | 29801     | zinc finger DHHC-type containing 8                      | 1,08  | 1,20    | 2,28 | 0,030   |
| HELZ2     | 12066  | 85441     | helicase with zinc finger 2                             | 1,07  | 4,50    | 2,35 | 0,026   |
| RASSF7    | 2492   | 8045      | Ras association domain family member 7                  | 1,05  | 2,00    | 2,29 | 0,029   |
| PARP10    | 6033   | 84875     | poly(ADP-ribose) polymerase family member 10            | 1,04  | 5,14    | 2,41 | 0,022   |
| NTNG2     | 7845   | 84628     | netrin G2                                               | 1,03  | 3,26    | 3,06 | 0,0046  |
| MX1       | 8616   | 4599      | MX dynamin like GTPase 1                                | 1,02  | 7,27    | 2,15 | 0,040   |
| FAAH      | 2776   | 2166      | fatty acid amide hydrolase                              | 1,02  | 1,77    | 3,77 | 0,00072 |
| SCO2      | 1361   | 9997      | SCO2, cytochrome c oxidase assembly protein             | 1,01  | 3,54    | 2,19 | 0,037   |
| AIFM3     | 5401   | 150209    | apoptosis inducing factor, mitochondria associated 3    | 1,01  | 1,00    | 2,93 | 0,0064  |
| ARHGEF10L | 7817   | 55160     | Rho guanine nucleotide exchange factor 10 like          | 1,01  | 3,31    | 2,96 | 0,0059  |
| SPNS3     | 2684   | 201305    | sphingolipid transporter 3 (putative)                   | 1,00  | 0,95    | 2,11 | 0,043   |
| KCNC4     | 25042  | 3749      | potassium voltage-gated channel subfamily C member 4    | 0,95  | 1,23    | 3,47 | 0,0016  |
| NFIC      | 9347   | 4782      | nuclear factor I C                                      | 0,94  | 1,14    | 2,42 | 0,022   |
| CARD9     | 6699   | 64170     | caspase recruitment domain family member 9              | 0,94  | 3,09    | 2,48 | 0,019   |
| THEM6     | 3055   | 51337     | thioesterase superfamily member 6                       | 0,93  | 1,79    | 2,61 | 0,014   |
| ABCD1     | 4233   | 215       | ATP binding cassette subfamily D member 1               | 0,93  | 1,16    | 2,36 | 0,025   |
| FAAP100   | 5354   | 80233     | Fanconi anemia core complex associated protein 100      | 0,93  | 1,60    | 2,46 | 0,020   |

|            |       |           |                                                                         |      |      |      |        |
|------------|-------|-----------|-------------------------------------------------------------------------|------|------|------|--------|
| BCL9L      | 10470 | 283149    | B cell CLL/lymphoma 9 like                                              | 0,93 | 3,22 | 2,34 | 0,026  |
| XAF1       | 6615  | 54739     | XIAP associated factor 1                                                | 0,92 | 7,84 | 2,34 | 0,026  |
| TSPAN4     | 5841  | 7106      | tetraspanin 4                                                           | 0,91 | 0,99 | 2,60 | 0,014  |
| ASPSCR1    | 12097 | 79058     | ASPSCR1, UBX domain containing tether for SLC2A4                        | 0,89 | 1,68 | 2,76 | 0,010  |
| SSBP4      | 2974  | 170463    | single stranded DNA binding protein 4                                   | 0,88 | 1,42 | 2,30 | 0,029  |
| GPR162     | 3295  | 27239     | G protein-coupled receptor 162                                          | 0,88 | 1,17 | 2,21 | 0,035  |
| S1PR3      | 8754  | 1903      | sphingosine-1-phosphate receptor 3                                      | 0,87 | 2,40 | 2,33 | 0,027  |
| ZC3H3      | 3731  | 23144     | zinc finger CCCH-type containing 3                                      | 0,87 | 1,73 | 2,64 | 0,013  |
| HNRNPA1P70 | 1087  | 341333    | heterogeneous nuclear ribonucleoprotein A1 pseudogene 70                | 0,87 | 1,73 | 2,72 | 0,011  |
| ZBP1       | 5405  | 81030     | Z-DNA binding protein 1                                                 | 0,86 | 5,28 | 2,47 | 0,019  |
| COL9A2     | 4151  | 1298      | collagen type IX alpha 2 chain                                          | 0,86 | 1,05 | 2,64 | 0,013  |
| MTCYBP23   | 1102  | 107075131 | mitochondrially encoded cytochrome b pseudogene 23                      | 0,86 | 1,24 | 2,48 | 0,019  |
| ARHGDI1    | 2903  | 396       | Rho GDP dissociation inhibitor alpha                                    | 0,86 | 2,15 | 2,47 | 0,019  |
| TELO2      | 4239  | 9894      | telomere maintenance 2                                                  | 0,85 | 1,89 | 2,26 | 0,031  |
| NDUFB7     | 531   | 4713      | NADH:ubiquinone oxidoreductase subunit B7                               | 0,85 | 2,00 | 2,07 | 0,047  |
| CAP2P1     | 1390  | 353163    | cyclase associated actin cytoskeleton regulatory protein 2 pseudogene 1 | 0,85 | 0,82 | 2,29 | 0,029  |
| SLC9A1     | 5974  | 6548      | solute carrier family 9 member A1                                       | 0,84 | 2,01 | 2,37 | 0,024  |
| CEP295NL   | 2758  | 100653515 | CEP295 N-terminal like                                                  | 0,84 | 1,25 | 2,75 | 0,010  |
| ECH1       | 2467  | 1891      | enoyl-CoA hydratase 1                                                   | 0,83 | 3,79 | 2,67 | 0,012  |
| B4GALT7    | 4927  | 11285     | beta-1,4-galactosyltransferase 7                                        | 0,83 | 2,42 | 2,93 | 0,0064 |
| PLXNB2     | 7257  | 23654     | plexin B2                                                               | 0,81 | 4,58 | 2,29 | 0,029  |
| C7orf50    | 4961  | 84310     | chromosome 7 open reading frame 50                                      | 0,80 | 2,00 | 2,40 | 0,023  |
| HLA-DQB2   | 2028  | 3120      | major histocompatibility complex, class II, DQ beta 2                   | 0,80 | 2,60 | 2,44 | 0,021  |
| C1QA       | 1272  | 712       | complement C1q A chain                                                  | 0,80 | 0,78 | 2,24 | 0,033  |
| C11orf24   | 3406  | 53838     | chromosome 11 open reading frame 24                                     | 0,80 | 1,93 | 2,12 | 0,042  |
| DPP7       | 2820  | 29952     | dipeptidyl peptidase 7                                                  | 0,79 | 3,38 | 2,04 | 0,050  |
| LRRRC45    | 3606  | 201255    | leucine rich repeat containing 45                                       | 0,79 | 2,25 | 2,68 | 0,012  |
| LRP1       | 20839 | 4035      | LDL receptor related protein 1                                          | 0,78 | 6,66 | 2,61 | 0,014  |
| NELFA      | 5935  | 7469      | negative elongation factor complex member A                             | 0,78 | 1,73 | 2,32 | 0,027  |
| IGSF9B     | 5753  | 22997     | immunoglobulin superfamily member 9B                                    | 0,77 | 0,72 | 2,44 | 0,021  |
| FLYWCH1    | 8419  | 84256     | FLYWCH-type zinc finger 1                                               | 0,76 | 2,46 | 2,13 | 0,041  |
| STAB1      | 10588 | 23166     | stabilin 1                                                              | 0,75 | 4,99 | 2,27 | 0,031  |
| PPP1R26    | 5276  | 9858      | protein phosphatase 1 regulatory subunit 26                             | 0,75 | 1,50 | 2,70 | 0,011  |
| FAM129B    | 4629  | 64855     | family with sequence similarity 129 member B                            | 0,75 | 3,28 | 2,40 | 0,023  |
| DHX58      | 3843  | 79132     | DExH-box helicase 58                                                    | 0,75 | 4,80 | 2,18 | 0,037  |

|            |       |        |                                                                            |      |      |      |        |
|------------|-------|--------|----------------------------------------------------------------------------|------|------|------|--------|
| DLGAP4     | 8789  | 22839  | DLG associated protein 4                                                   | 0,75 | 1,74 | 2,57 | 0,015  |
| TNRC18     | 12572 | 84629  | trinucleotide repeat containing 18                                         | 0,75 | 3,82 | 2,27 | 0,030  |
| BRICD5     | 2083  | 283870 | BRICHOS domain containing 5                                                | 0,74 | 1,55 | 2,67 | 0,012  |
| GPBAR1     | 2692  | 151306 | G protein-coupled bile acid receptor 1                                     | 0,74 | 1,96 | 2,13 | 0,041  |
| NR1H3      | 4533  | 10062  | nuclear receptor subfamily 1 group H member 3                              | 0,74 | 0,94 | 2,97 | 0,0058 |
| CHKB-CPT1B | 5022  | 386593 | CHKB-CPT1B readthrough (NMD candidate)                                     | 0,74 | 0,99 | 2,33 | 0,027  |
| ANO8       | 4979  | 57719  | anoctamin 8                                                                | 0,74 | 1,44 | 2,86 | 0,008  |
| LENG8      | 6469  | 114823 | leukocyte receptor cluster member 8                                        | 0,74 | 4,52 | 2,30 | 0,029  |
| POLRMTP1   | 3668  | 284167 | RNA polymerase mitochondrial pseudogene 1                                  | 0,74 | 1,05 | 2,59 | 0,015  |
| TTC21A     | 7735  | 199223 | tetratricopeptide repeat domain 21A                                        | 0,73 | 2,51 | 2,46 | 0,020  |
| POMGNT2    | 2668  | 84892  | protein O-linked mannose N-acetylglucosaminyltransferase 2 (beta 1,4-)     | 0,72 | 1,32 | 2,40 | 0,023  |
| MIR4697HG  | 5164  | 283174 | MIR4697 host gene                                                          | 0,72 | 1,77 | 2,58 | 0,015  |
| ST14       | 4350  | 6768   | suppression of tumorigenicity 14                                           | 0,72 | 2,54 | 2,17 | 0,038  |
| ZNF444     | 7239  | 55311  | zinc finger protein 444                                                    | 0,72 | 1,59 | 2,71 | 0,011  |
| HIST1H2AI  | 503   | 8329   | histone cluster 1 H2A family member i                                      | 0,72 | 2,31 | 2,17 | 0,038  |
| WIZ        | 7965  | 58525  | widely interspaced zinc finger motifs                                      | 0,72 | 1,17 | 2,07 | 0,047  |
| SLC12A7    | 5984  | 10723  | solute carrier family 12 member 7                                          | 0,71 | 3,24 | 2,32 | 0,027  |
| TTC16      | 6370  | 158248 | tetratricopeptide repeat domain 16                                         | 0,71 | 2,27 | 2,44 | 0,021  |
| MIR142     | 1625  | 406934 | microRNA 142                                                               | 0,71 | 3,61 | 2,14 | 0,041  |
| ZNF618     | 10384 | 114991 | zinc finger protein 618                                                    | 0,71 | 0,86 | 2,93 | 0,0064 |
| C3AR1      | 2145  | 719    | complement C3a receptor 1                                                  | 0,71 | 4,01 | 2,65 | 0,013  |
| HERC6      | 5793  | 55008  | HECT and RLD domain containing E3 ubiquitin protein ligase family member 6 | 0,71 | 5,32 | 2,40 | 0,023  |
| DUS3L      | 3642  | 56931  | dihydrouridine synthase 3 like                                             | 0,71 | 2,53 | 2,18 | 0,037  |
| LRP5L      | 4555  | 91355  | LDL receptor related protein 5 like                                        | 0,70 | 2,73 | 3,05 | 0,0047 |
| FBXW5      | 3252  | 54461  | F-box and WD repeat domain containing 5                                    | 0,70 | 4,07 | 2,17 | 0,038  |
| STMN3      | 3032  | 50861  | stathmin 3                                                                 | 0,70 | 3,85 | 2,35 | 0,026  |
| AATBC      | 4874  | 284837 | apoptosis associated transcript in bladder cancer                          | 0,70 | 4,17 | 2,73 | 0,010  |
| RABGGTA    | 3545  | 5875   | Rab geranylgeranyltransferase alpha subunit                                | 0,70 | 2,10 | 2,82 | 0,0085 |
| MLST8      | 4323  | 64223  | MTOR associated protein, LST8 homolog                                      | 0,70 | 1,92 | 2,34 | 0,026  |
| SYNGAP1    | 12695 | 8831   | synaptic Ras GTPase activating protein 1                                   | 0,69 | 2,35 | 2,26 | 0,031  |
| MROH1      | 10903 | 727957 | maestro heat like repeat family member 1                                   | 0,69 | 2,69 | 2,30 | 0,029  |
| CLEC6A     | 1682  | 93978  | C-type lectin domain containing 6A                                         | 0,69 | 1,10 | 2,09 | 0,046  |
| IQSEC2     | 6962  | 23096  | IQ motif and Sec7 domain 2                                                 | 0,69 | 0,73 | 2,04 | 0,050  |
| PRAM1      | 3763  | 84106  | PML-RARA regulated adaptor molecule 1                                      | 0,69 | 3,02 | 2,77 | 0,0096 |
| NCOR2      | 13975 | 9612   | nuclear receptor corepressor 2                                             | 0,69 | 3,47 | 2,39 | 0,023  |

|            |       |           |                                                                    |      |      |      |        |
|------------|-------|-----------|--------------------------------------------------------------------|------|------|------|--------|
| DRAP1      | 1737  | 10589     | DR1 associated protein 1                                           | 0,68 | 3,82 | 2,15 | 0,040  |
| CDC42BPG   | 6112  | 55561     | CDC42 binding protein kinase gamma                                 | 0,68 | 0,80 | 2,08 | 0,046  |
| TNFSF13    | 2276  | 8741      | TNF superfamily member 13                                          | 0,68 | 1,50 | 2,12 | 0,042  |
| GADD45GIP1 | 1782  | 90480     | GADD45G interacting protein 1                                      | 0,68 | 2,55 | 2,07 | 0,047  |
| PARP12     | 6285  | 64761     | poly(ADP-ribose) polymerase family member 12                       | 0,67 | 6,44 | 2,55 | 0,016  |
| SLC25A29   | 7451  | 123096    | solute carrier family 25 member 29                                 | 0,67 | 2,84 | 2,37 | 0,025  |
| LLGL1      | 6638  | 3996      | LLGL1, scribble cell polarity complex component                    | 0,67 | 2,58 | 2,17 | 0,038  |
| BST2       | 1119  | 684       | bone marrow stromal cell antigen 2                                 | 0,67 | 4,99 | 2,05 | 0,050  |
| HLA-DRB6   | 1326  | 3128      | major histocompatibility complex, class II, DR beta 6 (pseudogene) | 0,66 | 4,48 | 2,17 | 0,038  |
| UNC93B1    | 3548  | 81622     | unc-93 homolog B1, TLR signaling regulator                         | 0,66 | 4,72 | 2,15 | 0,039  |
| C9orf139   | 4990  | 401563    | chromosome 9 open reading frame 139                                | 0,66 | 2,66 | 2,21 | 0,035  |
| RFNG       | 3865  | 5986      | RFNG O-fucosylpeptide 3-beta-N-acetylglucosaminyltransferase       | 0,66 | 1,23 | 2,15 | 0,040  |
| HK3        | 3290  | 3101      | hexokinase 3                                                       | 0,66 | 6,51 | 2,14 | 0,041  |
| SUMO2P6    | 288   | 100127922 | SUMO2 pseudogene 6                                                 | 0,66 | 0,92 | 2,16 | 0,039  |
| GALNS      | 8402  | 2588      | galactosamine (N-acetyl)-6-sulfatase                               | 0,65 | 3,34 | 2,98 | 0,0057 |
| PILRB      | 5764  | 29990     | paired immunoglobulin-like type 2 receptor beta                    | 0,65 | 3,81 | 2,50 | 0,018  |
| TNK2       | 11297 | 10188     | tyrosine kinase non receptor 2                                     | 0,65 | 4,68 | 2,09 | 0,045  |
| TP53I3     | 2312  | 9540      | tumor protein p53 inducible protein 3                              | 0,65 | 1,48 | 2,25 | 0,032  |
| USP35      | 5233  | 57558     | ubiquitin specific peptidase 35                                    | 0,64 | 1,39 | 2,32 | 0,027  |
| KCTD17     | 2786  | 79734     | potassium channel tetramerization domain containing 17             | 0,64 | 1,29 | 2,10 | 0,044  |
| MYO15B     | 12761 | 80022     | myosin XVB                                                         | 0,63 | 5,57 | 2,27 | 0,031  |
| TTYH2      | 5375  | 94015     | tweety family member 2                                             | 0,63 | 2,54 | 3,00 | 0,0054 |
| ACAP3      | 8809  | 116983    | ArfGAP with coiled-coil, ankyrin repeat and PH domains 3           | 0,63 | 3,28 | 2,17 | 0,038  |
| NRROS      | 2910  | 375387    | negative regulator of reactive oxygen species                      | 0,63 | 1,74 | 2,44 | 0,021  |
| ATP13A1    | 8376  | 57130     | ATPase 13A1                                                        | 0,63 | 3,04 | 2,54 | 0,017  |
| SLC27A5    | 8025  | 10998     | solute carrier family 27 member 5                                  | 0,63 | 0,92 | 2,60 | 0,014  |
| RPL7AP64   | 663   | 728486    | ribosomal protein L7a pseudogene 64                                | 0,63 | 2,06 | 2,89 | 0,0070 |
| GRAMD1B    | 13946 | 57476     | GRAM domain containing 1B                                          | 0,62 | 3,38 | 2,43 | 0,021  |
| ARFGAP1    | 6613  | 55738     | ADP ribosylation factor GTPase activating protein 1                | 0,62 | 3,12 | 2,12 | 0,042  |
| PRKD2      | 5446  | 25865     | protein kinase D2                                                  | 0,61 | 4,80 | 3,20 | 0,0032 |
| TRMT112P6  | 372   | 391358    | tRNA methyltransferase subunit 11-2 pseudogene 6                   | 0,61 | 0,92 | 2,12 | 0,043  |
| CTIF       | 8100  | 9811      | cap binding complex dependent translation initiation factor        | 0,61 | 0,90 | 2,21 | 0,035  |
| EEFSEC     | 2421  | 60678     | eukaryotic elongation factor, selenocysteine-tRNA specific         | 0,61 | 1,79 | 2,76 | 0,010  |
| PSRC1      | 2855  | 84722     | proline and serine rich coiled-coil 1                              | 0,60 | 2,07 | 2,39 | 0,023  |
| FAM102A    | 6100  | 399665    | family with sequence similarity 102 member A                       | 0,60 | 3,78 | 2,24 | 0,033  |

|            |       |           |                                                                                           |       |      |       |        |
|------------|-------|-----------|-------------------------------------------------------------------------------------------|-------|------|-------|--------|
| CROCCP3    | 6813  | 114819    | ciliary rootlet coiled-coil, rootletin pseudogene 3                                       | 0,60  | 2,21 | 3,06  | 0,0046 |
| DHRS1      | 5002  | 115817    | dehydrogenase/reductase 1                                                                 | 0,60  | 2,39 | 2,62  | 0,014  |
| HPS6       | 2649  | 79803     | HPS6, biogenesis of lysosomal organelles complex 2 subunit 3                              | 0,60  | 2,60 | 2,42  | 0,022  |
| ASTN2      | 8290  | 23245     | astrotactin 2                                                                             | 0,60  | 1,02 | 2,47  | 0,019  |
| MVB12B     | 7884  | 89853     | multivesicular body subunit 12B                                                           | 0,59  | 1,52 | 2,57  | 0,015  |
| TIAF1      | 5337  | 9220      | TGFB1-induced anti-apoptotic factor 1                                                     | 0,59  | 1,44 | 2,54  | 0,017  |
| PPARGC1B   | 12889 | 133522    | PPARG coactivator 1 beta                                                                  | 0,59  | 3,06 | 2,66  | 0,012  |
| KMT5C      | 4775  | 84787     | lysine methyltransferase 5C                                                               | 0,59  | 0,83 | 2,33  | 0,026  |
| TPRG1      | 9535  | 285386    | tumor protein p63 regulated 1                                                             | 0,59  | 1,65 | 2,19  | 0,036  |
| PRDX6      | 2367  | 9588      | peroxiredoxin 6                                                                           | -0,59 | 8,49 | -2,11 | 0,044  |
| CFAP53     | 1851  | 220136    | cilia and flagella associated protein 53                                                  | -0,59 | 0,77 | -2,16 | 0,038  |
| MYLK       | 22167 | 4638      | myosin light chain kinase                                                                 | -0,59 | 6,02 | -2,23 | 0,033  |
| USP12      | 5195  | 219333    | ubiquitin specific peptidase 12                                                           | -0,59 | 8,84 | -2,09 | 0,045  |
| MEST       | 4631  | 4232      | mesoderm specific transcript                                                              | -0,59 | 2,78 | -3,19 | 0,0033 |
| F13A1      | 4690  | 2162      | coagulation factor XIII A chain                                                           | -0,63 | 9,21 | -2,55 | 0,016  |
| ITGA9      | 8277  | 3680      | integrin subunit alpha 9                                                                  | -0,63 | 1,02 | -2,31 | 0,028  |
| NCR1       | 1893  | 9437      | natural cytotoxicity triggering receptor 1                                                | -0,63 | 2,86 | -2,50 | 0,018  |
| RNF14      | 4987  | 9604      | ring finger protein 14                                                                    | -0,64 | 7,85 | -2,51 | 0,018  |
| GRAMD1C    | 7814  | 54762     | GRAM domain containing 1C                                                                 | -0,64 | 4,05 | -2,18 | 0,037  |
| TRAPPC3L   | 2757  | 100128327 | trafficking protein particle complex 3 like                                               | -0,64 | 3,06 | -2,20 | 0,036  |
| FAM46C     | 5751  | 54855     | family with sequence similarity 46 member C                                               | -0,65 | 11,8 | -2,20 | 0,036  |
| PHEX       | 6384  | 5251      | phosphate regulating endopeptidase homolog X-linked                                       | -0,66 | 2,29 | -2,26 | 0,031  |
| PLEK2      | 1603  | 26499     | pleckstrin 2                                                                              | -0,66 | 4,79 | -2,51 | 0,0177 |
| MAP7       | 5447  | 9053      | microtubule associated protein 7                                                          | -0,67 | 1,92 | -2,26 | 0,031  |
| GOLGA8N    | 7602  | 643699    | golgin A8 family member N                                                                 | -0,67 | 1,36 | -2,14 | 0,041  |
| RBMS3      | 18339 | 27303     | RNA binding motif single stranded interacting protein 3                                   | -0,67 | 0,76 | -2,13 | 0,042  |
| PCMTD1P3   | 472   | 100422595 | protein-L-isoaspartate (D-aspartate) O-methyltransferase domain containing 1 pseudogene 3 | -0,67 | 1,25 | -2,81 | 0,0086 |
| TRAV22     | 464   | 28661     | T cell receptor alpha variable 22                                                         | -0,69 | 0,85 | -2,53 | 0,017  |
| ZNF667-AS1 | 3629  | 100128252 | ZNF667 antisense RNA 1 (head to head)                                                     | -0,69 | 0,75 | -2,17 | 0,038  |
| FKBP1B     | 1677  | 2281      | FK506 binding protein 1B                                                                  | -0,69 | 2,44 | -2,27 | 0,030  |
| RPS4XP7    | 780   | 442162    | ribosomal protein S4X pseudogene 7                                                        | -0,69 | 0,61 | -2,28 | 0,030  |
| GZMB       | 1411  | 3002      | granzyme B                                                                                | -0,71 | 5,26 | -2,40 | 0,023  |
| SLC6A4     | 6983  | 6532      | solute carrier family 6 member 4                                                          | -0,72 | 1,34 | -2,26 | 0,031  |
| PAGE2B     | 507   | 389860    | PAGE family member 2B                                                                     | -0,73 | 1,70 | -2,27 | 0,030  |

|            |       |           |                                                           |       |       |       |        |
|------------|-------|-----------|-----------------------------------------------------------|-------|-------|-------|--------|
| ELL2P1     | 1906  | 646270    | elongation factor for RNA polymerase II 2 pseudogene 1    | -0,75 | 0,80  | -2,43 | 0,021  |
| ABCA13     | 19074 | 154664    | ATP binding cassette subfamily A member 13                | -0,75 | 3,63  | -2,12 | 0,043  |
| SNCA       | 4014  | 6622      | synuclein alpha                                           | -0,76 | 11,8  | -2,26 | 0,031  |
| GYPB       | 1566  | 2994      | glycophorin B (MNS blood group)                           | -0,76 | 5,19  | -2,76 | 0,0096 |
| TCN1       | 1586  | 6947      | transcobalamin 1                                          | -0,77 | 2,90  | -2,95 | 0,0061 |
| SPATA20    | 5337  | 64847     | spermatogenesis associated 20                             | -0,80 | 2,57  | -2,39 | 0,023  |
| UBB        | 1621  | 7314      | ubiquitin B                                               | -0,82 | 10,9  | -2,51 | 0,017  |
| IGKV3D-20  | 445   | 28874     | immunoglobulin kappa variable 3D-20                       | -0,86 | 0,89  | -2,23 | 0,034  |
| EPB42      | 5574  | 2038      | erythrocyte membrane protein band 4.2                     | -0,87 | 7,14  | -2,60 | 0,014  |
| NFIB       | 12765 | 4781      | nuclear factor I B                                        | -0,87 | 1,11  | -2,76 | 0,010  |
| DPCD       | 1718  | 25911     | deleted in primary ciliary dyskinesia homolog (mouse)     | -0,87 | 2,26  | -2,13 | 0,041  |
| HAVCR1     | 2151  | 26762     | hepatitis A virus cellular receptor 1                     | -0,87 | 1,39  | -3,07 | 0,004  |
| EREG       | 5717  | 2069      | epiregulin                                                | -0,87 | 1,69  | -2,09 | 0,045  |
| TRIM40     | 2497  | 135644    | tripartite motif containing 40                            | -0,89 | 0,91  | -2,12 | 0,043  |
| SH2D1B     | 2797  | 117157    | SH2 domain containing 1B                                  | -0,89 | 3,35  | -2,45 | 0,020  |
| NCAM1      | 12737 | 4684      | neural cell adhesion molecule 1                           | -0,89 | 3,68  | -3,01 | 0,0052 |
| PITHD1     | 2186  | 57095     | PITH domain containing 1                                  | -0,91 | 8,28  | -2,99 | 0,0054 |
| KLRF1      | 1260  | 51348     | killer cell lectin like receptor F1                       | -0,94 | 4,65  | -2,58 | 0,015  |
| AKR1C3     | 4532  | 8644      | aldo-keto reductase family 1 member C3                    | -0,98 | 2,23  | -2,88 | 0,0072 |
| HLA-DQB1   | 4904  | 3119      | major histocompatibility complex, class II, DQ beta 1     | -1,01 | 6,17  | -2,63 | 0,013  |
| SLC8A3     | 8444  | 6547      | solute carrier family 8 member A3                         | -1,02 | 1,41  | -2,39 | 0,023  |
| ANO2       | 6255  | 57101     | anoctamin 2                                               | -1,04 | 0,87  | -2,42 | 0,022  |
| ADAMTS1    | 7063  | 9510      | ADAM metalloproteinase with thrombospondin type 1 motif 1 | -1,07 | 1,91  | -2,40 | 0,023  |
| SLPI       | 596   | 6590      | secretory leukocyte peptidase inhibitor                   | -1,07 | 2,16  | -2,30 | 0,029  |
| MAGI2-AS3  | 11625 | 100505881 | MAGI2 antisense RNA 3                                     | -1,14 | 2,16  | -2,21 | 0,035  |
| KANSL1-AS1 | 976   | 644246    | KANSL1 antisense RNA 1                                    | -1,18 | 1,60  | -3,06 | 0,0046 |
| FAT4       | 16439 | 79633     | FAT atypical cadherin 4                                   | -1,27 | 1,48  | -3,50 | 0,0015 |
| RPS4XP22   | 780   | 100131614 | ribosomal protein S4X pseudogene 22                       | -1,45 | 3,13  | -2,11 | 0,043  |
| CRISP3     | 2247  | 10321     | cysteine rich secretory protein 3                         | -1,69 | 1,96  | -3,36 | 0,0021 |
| XKR3       | 1690  | 150165    | XK related 3                                              | -1,69 | -0,19 | -2,18 | 0,037  |
| DAAM2      | 12955 | 23500     | dishevelled associated activator of morphogenesis 2       | -1,73 | 0,69  | -3,41 | 0,0019 |
| CEACAM8    | 2551  | 1088      | carcinoembryonic antigen related cell adhesion molecule 8 | -1,74 | 1,12  | -2,84 | 0,0081 |

**CDM3vsCDM0**

| Gene ID    | Length | Entrez ID | Name                                                                       | logFC | AveExpr | t    | p-value |
|------------|--------|-----------|----------------------------------------------------------------------------|-------|---------|------|---------|
| NACA3P     | 648    | 389240    | NACA family member 3 pseudogene                                            | 1,53  | 3,70    | 2,68 | 0,012   |
| IFI44L     | 10240  | 10964     | interferon induced protein 44 like                                         | 1,42  | 6,87    | 2,20 | 0,036   |
| RSAD2      | 4834   | 91543     | radical S-adenosyl methionine domain containing 2                          | 1,40  | 6,70    | 2,07 | 0,047   |
| IDO1       | 3261   | 3620      | indoleamine 2,3-dioxygenase 1                                              | 1,36  | 3,66    | 2,91 | 0,0066  |
| VSTM1      | 1111   | 284415    | V-set and transmembrane domain containing 1                                | 1,27  | 3,02    | 3,33 | 0,0023  |
| IFIT3      | 2640   | 3437      | interferon induced protein with tetratricopeptide repeats 3                | 1,18  | 8,32    | 2,11 | 0,043   |
| IFI44      | 2038   | 10561     | interferon induced protein 44                                              | 1,15  | 6,43    | 2,14 | 0,041   |
| HERC5      | 4766   | 51191     | HECT and RLD domain containing E3 ubiquitin protein ligase 5               | 1,13  | 6,42    | 2,06 | 0,048   |
| OAS3       | 8251   | 4940      | 2'-5'-oligoadenylate synthetase 3                                          | 1,08  | 5,74    | 2,20 | 0,036   |
| SLC16A14   | 4946   | 151473    | solute carrier family 16 member 14                                         | 1,06  | 0,68    | 2,63 | 0,013   |
| RNASE2     | 755    | 6036      | ribonuclease A family member 2                                             | 1,00  | 3,72    | 2,43 | 0,021   |
| KIAA1024   | 6800   | 23251     | KIAA1024                                                                   | 0,99  | 0,54    | 2,20 | 0,035   |
| MARCO      | 2079   | 8685      | macrophage receptor with collagenous structure                             | 0,96  | 2,05    | 2,37 | 0,024   |
| ZBP1       | 5405   | 81030     | Z-DNA binding protein 1                                                    | 0,87  | 5,28    | 2,51 | 0,018   |
| NTNG2      | 7845   | 84628     | netrin G2                                                                  | 0,86  | 3,26    | 2,63 | 0,013   |
| XAF1       | 6615   | 54739     | XIAP associated factor 1                                                   | 0,85  | 7,84    | 2,23 | 0,033   |
| FBN1       | 16057  | 2200      | fibrillin 1                                                                | 0,85  | 1,56    | 2,33 | 0,027   |
| SAMD9L     | 7135   | 219285    | sterile alpha motif domain containing 9 like                               | 0,80  | 8,97    | 2,20 | 0,035   |
| DDX58      | 4353   | 23586     | DExD/H-box helicase 58                                                     | 0,77  | 8,14    | 2,19 | 0,037   |
| DHX58      | 3843   | 79132     | DExH-box helicase 58                                                       | 0,71  | 4,80    | 2,09 | 0,045   |
| EIF2AK2    | 10753  | 5610      | eukaryotic translation initiation factor 2 alpha kinase 2                  | 0,71  | 7,19    | 2,24 | 0,033   |
| C9orf66    | 2918   | 157983    | chromosome 9 open reading frame 66                                         | 0,70  | 1,13    | 2,05 | 0,049   |
| CD101      | 3828   | 9398      | CD101 molecule                                                             | 0,68  | 4,64    | 3,05 | 0,0048  |
| TRIM22     | 6020   | 10346     | tripartite motif containing 22                                             | 0,68  | 9,19    | 2,14 | 0,041   |
| RNF213     | 28570  | 57674     | ring finger protein 213                                                    | 0,66  | 10,6    | 2,65 | 0,013   |
| SNORA22    | 540    | 677807    | small nucleolar RNA, H/ACA box 22                                          | 0,66  | 1,17    | 2,72 | 0,011   |
| HERC6      | 5793   | 55008     | HECT and RLD domain containing E3 ubiquitin protein ligase family member 6 | 0,65  | 5,32    | 2,25 | 0,032   |
| CATSPERG   | 9190   | 57828     | cation channel sperm associated auxiliary subunit gamma                    | 0,65  | 1,61    | 2,78 | 0,0093  |
| SNORA73B   | 204    | 26768     | small nucleolar RNA, H/ACA box 73B                                         | 0,65  | 6,69    | 3,12 | 0,0039  |
| HNRNPA1P70 | 1087   | 341333    | heterogeneous nuclear ribonucleoprotein A1 pseudogene 70                   | 0,64  | 1,73    | 2,13 | 0,042   |
| CCDC170    | 5419   | 80129     | coiled-coil domain containing 170                                          | 0,64  | 3,39    | 2,89 | 0,0071  |
| PARP12     | 6285   | 64761     | poly(ADP-ribose) polymerase family member 12                               | 0,63  | 6,44    | 2,44 | 0,021   |
| MRPL36     | 1394   | 64979     | mitochondrial ribosomal protein L36                                        | 0,63  | 1,46    | 2,66 | 0,012   |

|           |       |           |                                                              |       |      |       |        |
|-----------|-------|-----------|--------------------------------------------------------------|-------|------|-------|--------|
| CBWD5     | 12708 | 220869    | COBW domain containing 5                                     | 0,62  | 2,56 | 2,61  | 0,014  |
| SNORA49   | 136   | 677829    | small nucleolar RNA, H/ACA box 49                            | 0,62  | 3,24 | 2,12  | 0,042  |
| LINC00174 | 5627  | 285908    | long intergenic non-protein coding RNA 174                   | 0,61  | 0,98 | 2,51  | 0,018  |
| KIAA1958  | 13119 | 158405    | KIAA1958                                                     | 0,60  | 3,40 | 2,17  | 0,038  |
| IL15      | 7860  | 3600      | interleukin 15                                               | 0,60  | 3,65 | 2,47  | 0,019  |
| SAT1      | 2498  | 6303      | spermidine/spermine N1-acetyltransferase 1                   | 0,59  | 9,10 | 2,08  | 0,046  |
| MAP2K6    | 6125  | 5608      | mitogen-activated protein kinase kinase 6                    | 0,59  | 4,74 | 2,62  | 0,013  |
| VEGFA     | 14431 | 7422      | vascular endothelial growth factor A                         | 0,59  | 2,79 | 3,04  | 0,0048 |
| TRAPPC3L  | 2757  | 100128327 | trafficking protein particle complex 3 like                  | -0,60 | 3,06 | -2,06 | 0,048  |
| CLEC1B    | 3670  | 51266     | C-type lectin domain family 1 member B                       | -0,60 | 4,09 | -2,34 | 0,026  |
| GPR15     | 1252  | 2838      | G protein-coupled receptor 15                                | -0,61 | 2,36 | -2,66 | 0,012  |
| EPB41     | 10739 | 2035      | erythrocyte membrane protein band 4.1                        | -0,61 | 12,0 | -2,36 | 0,025  |
| ST20-AS1  | 4223  | 283687    | ST20 antisense RNA 1                                         | -0,61 | 0,94 | -2,22 | 0,034  |
| FAM46C    | 5751  | 54855     | family with sequence similarity 46 member C                  | -0,62 | 11,8 | -2,18 | 0,037  |
| RAB2B     | 3610  | 84932     | RAB2B, member RAS oncogene family                            | -0,64 | 8,14 | -2,33 | 0,026  |
| HEMGN     | 2394  | 55363     | hemogen                                                      | -0,64 | 10,4 | -2,17 | 0,038  |
| MYCT1     | 3030  | 80177     | MYC target 1                                                 | -0,65 | 2,80 | -2,49 | 0,018  |
| PRDX6     | 2367  | 9588      | peroxiredoxin 6                                              | -0,65 | 8,49 | -2,41 | 0,022  |
| GSPT1     | 8018  | 2935      | G1 to S phase transition 1                                   | -0,65 | 10,2 | -2,43 | 0,021  |
| FKBP1B    | 1677  | 2281      | FK506 binding protein 1B                                     | -0,66 | 2,44 | -2,19 | 0,036  |
| DDX6P1    | 1436  | 442192    | DEAD-box helicase 6 pseudogene 1                             | -0,66 | 1,01 | -2,22 | 0,034  |
| IFIT1B    | 1972  | 439996    | interferon induced protein with tetratricopeptide repeats 1B | -0,67 | 7,15 | -2,22 | 0,034  |
| TBCEL     | 7020  | 219899    | tubulin folding cofactor E like                              | -0,68 | 8,59 | -2,51 | 0,018  |
| GLRX5     | 2845  | 51218     | glutaredoxin 5                                               | -0,68 | 8,20 | -2,36 | 0,025  |
| MAP7      | 5447  | 9053      | microtubule associated protein 7                             | -0,68 | 1,92 | -2,32 | 0,027  |
| TCN1      | 1586  | 6947      | transcobalamin 1                                             | -0,68 | 2,90 | -2,61 | 0,014  |
| BPGM      | 2539  | 669       | bisphosphoglycerate mutase                                   | -0,69 | 9,34 | -2,20 | 0,035  |
| DYRK3     | 4218  | 8444      | dual specificity tyrosine phosphorylation regulated kinase 3 | -0,70 | 2,96 | -2,83 | 0,0082 |
| UBXN10    | 5571  | 127733    | UBX domain protein 10                                        | -0,70 | 1,93 | -2,36 | 0,025  |
| RTCA-AS1  | 423   | 100506007 | RTCA antisense RNA 1                                         | -0,71 | 0,95 | -2,43 | 0,021  |
| DNAJA4    | 6591  | 55466     | DnaJ heat shock protein family (Hsp40) member A4             | -0,71 | 6,23 | -2,96 | 0,0059 |
| HAVCR1    | 2151  | 26762     | hepatitis A virus cellular receptor 1                        | -0,71 | 1,39 | -2,49 | 0,018  |
| NFIB      | 12765 | 4781      | nuclear factor I B                                           | -0,75 | 1,11 | -2,35 | 0,025  |
| ARHGEF37  | 5324  | 389337    | Rho guanine nucleotide exchange factor 37                    | -0,75 | 2,22 | -2,24 | 0,033  |
| RAB6B     | 6005  | 51560     | RAB6B, member RAS oncogene family                            | -0,76 | 1,50 | -3,28 | 0,0026 |



|           |       |           |                                                           |       |      |       |        |
|-----------|-------|-----------|-----------------------------------------------------------|-------|------|-------|--------|
| SPATA20   | 5337  | 64847     | spermatogenesis associated 20                             | -0,78 | 2,57 | -2,33 | 0,026  |
| C9orf153  | 1932  | 389766    | chromosome 9 open reading frame 153                       | -0,79 | 1,59 | -2,06 | 0,048  |
| SNCA      | 4014  | 6622      | synuclein alpha                                           | -0,80 | 11,8 | -2,47 | 0,019  |
| UBBP4     | 1459  | 23666     | ubiquitin B pseudogene 4                                  | -0,80 | 2,98 | -2,07 | 0,047  |
| UBE2O     | 6472  | 63893     | ubiquitin conjugating enzyme E2 O                         | -0,82 | 5,69 | -2,33 | 0,027  |
| GYPB      | 1566  | 2994      | glycophorin B (MNS blood group)                           | -0,82 | 5,19 | -3,02 | 0,0052 |
| ELL2P1    | 1906  | 646270    | elongation factor for RNA polymerase II 2 pseudogene 1    | -0,84 | 0,80 | -2,77 | 0,0095 |
| NINJ2     | 2048  | 4815      | ninjurin 2                                                | -0,84 | 4,38 | -2,22 | 0,034  |
| NAT8B     | 765   | 51471     | N-acetyltransferase 8B (putative, gene/pseudogene)        | -0,85 | 0,79 | -2,73 | 0,010  |
| DPCD      | 1718  | 25911     | deleted in primary ciliary dyskinesia homolog (mouse)     | -0,85 | 2,26 | -2,10 | 0,045  |
| UBB       | 1621  | 7314      | ubiquitin B                                               | -0,86 | 10,9 | -2,74 | 0,010  |
| EPB42     | 5574  | 2038      | erythrocyte membrane protein band 4.2                     | -0,89 | 7,14 | -2,73 | 0,011  |
| PAGE2B    | 507   | 389860    | PAGE family member 2B                                     | -0,89 | 1,70 | -2,84 | 0,0080 |
| FAXDC2    | 7222  | 10826     | fatty acid hydroxylase domain containing 2                | -0,90 | 6,67 | -2,42 | 0,022  |
| ANO2      | 6255  | 57101     | anoctamin 2                                               | -0,90 | 0,87 | -2,09 | 0,045  |
| PAQR9     | 4169  | 344838    | progesterin and adipoQ receptor family member 9           | -0,91 | 2,95 | -2,40 | 0,023  |
| SLC8A3    | 8444  | 6547      | solute carrier family 8 member A3                         | -0,92 | 1,41 | -2,17 | 0,038  |
| SLC6A4    | 6983  | 6532      | solute carrier family 6 member 4                          | -0,93 | 1,34 | -3,02 | 0,0051 |
| PITHD1    | 2186  | 57095     | PITH domain containing 1                                  | -0,95 | 8,28 | -3,23 | 0,0029 |
| OSBP2     | 6700  | 23762     | oxysterol binding protein 2                               | -0,96 | 5,78 | -2,15 | 0,040  |
| CA1       | 4068  | 759       | carbonic anhydrase 1                                      | -0,98 | 8,03 | -2,23 | 0,033  |
| FADS2     | 11026 | 9415      | fatty acid desaturase 2                                   | -1,01 | 3,78 | -2,11 | 0,043  |
| XCL2      | 565   | 6846      | X-C motif chemokine ligand 2                              | -1,04 | 1,09 | -3,11 | 0,0040 |
| E2F2      | 5457  | 1870      | E2F transcription factor 2                                | -1,06 | 5,73 | -3,35 | 0,0022 |
| MAGI2-AS3 | 11625 | 100505881 | MAGI2 antisense RNA 3                                     | -1,11 | 2,16 | -2,15 | 0,040  |
| ADAMTS1   | 7063  | 9510      | ADAM metalloproteinase with thrombospondin type 1 motif 1 | -1,14 | 1,91 | -2,60 | 0,014  |
| NLRP2     | 6313  | 55655     | NLR family pyrin domain containing 2                      | -1,16 | 1,83 | -2,27 | 0,030  |
| PIGC      | 5225  | 5279      | phosphatidylinositol glycan anchor biosynthesis class C   | -1,21 | 7,03 | -2,52 | 0,017  |
| NKX3-1    | 3271  | 4824      | NK3 homeobox 1                                            | -1,78 | 2,48 | -2,07 | 0,047  |

**CDM0vsM0**

| Gene ID    | Length | Entrez ID | Name                                                                   | logFC | AveExpr | t    | p-value |
|------------|--------|-----------|------------------------------------------------------------------------|-------|---------|------|---------|
| TUBB2A     | 1727   | 7280      | tubulin beta 2A class IIa                                              | 2,53  | 1,15    | 2,05 | 0,049   |
| LRR37A4P   | 6924   | 55073     | leucine rich repeat containing 37 member A4, pseudogene                | 1,87  | 2,94    | 3,35 | 0,0022  |
| PF4V1      | 522    | 5197      | platelet factor 4 variant 1                                            | 1,60  | 1,47    | 2,46 | 0,020   |
| COL5A3     | 6750   | 50509     | collagen type V alpha 3 chain                                          | 1,48  | 0,38    | 2,08 | 0,046   |
| LGALS2     | 828    | 3957      | galectin 2                                                             | 1,06  | 3,29    | 2,90 | 0,0068  |
| PLA2G4C    | 6613   | 8605      | phospholipase A2 group IVC                                             | 0,94  | 1,38    | 2,35 | 0,026   |
| THEM6      | 3055   | 51337     | thioesterase superfamily member 6                                      | 0,88  | 1,79    | 2,43 | 0,021   |
| VWF        | 10391  | 7450      | von Willebrand factor                                                  | 0,88  | 0,99    | 2,14 | 0,040   |
| ARHGEF10L  | 7817   | 55160     | Rho guanine nucleotide exchange factor 10 like                         | 0,82  | 3,31    | 2,36 | 0,025   |
| NECTIN3    | 6184   | 25945     | nectin cell adhesion molecule 3                                        | 0,81  | 0,79    | 2,07 | 0,047   |
| FAAP100    | 5354   | 80233     | Fanconi anemia core complex associated protein 100                     | 0,80  | 1,60    | 2,07 | 0,047   |
| LRR345     | 3606   | 201255    | leucine rich repeat containing 45                                      | 0,79  | 2,25    | 2,68 | 0,012   |
| SUMO2P6    | 288    | 100127922 | SUMO2 pseudogene 6                                                     | 0,79  | 0,92    | 2,60 | 0,014   |
| PHLDB3     | 4553   | 653583    | pleckstrin homology like domain family B member 3                      | 0,77  | 1,21    | 2,25 | 0,032   |
| G6PC3      | 4551   | 92579     | glucose-6-phosphatase catalytic subunit 3                              | 0,76  | 0,84    | 2,69 | 0,012   |
| ASPSCR1    | 12097  | 79058     | ASPSCR1, UBX domain containing tether for SLC2A4                       | 0,75  | 1,68    | 2,27 | 0,030   |
| FLYWCH1    | 8419   | 84256     | FLYWCH-type zinc finger 1                                              | 0,75  | 2,46    | 2,09 | 0,045   |
| BOP1       | 3716   | 23246     | block of proliferation 1                                               | 0,74  | 1,30    | 2,09 | 0,046   |
| LINC01410  | 3038   | 103352539 | long intergenic non-protein coding RNA 1410                            | 0,74  | 2,62    | 2,05 | 0,049   |
| GADD45GIP1 | 1782   | 90480     | GADD45G interacting protein 1                                          | 0,69  | 2,55    | 2,10 | 0,045   |
| PLA2G15    | 4464   | 23659     | phospholipase A2 group XV                                              | 0,68  | 1,26    | 2,52 | 0,017   |
| TRMT112P6  | 372    | 391358    | tRNA methyltransferase subunit 11-2 pseudogene 6                       | 0,67  | 0,92    | 2,31 | 0,028   |
| POMGNT2    | 2668   | 84892     | protein O-linked mannose N-acetylglucosaminyltransferase 2 (beta 1,4-) | 0,67  | 1,32    | 2,19 | 0,036   |
| SLC12A7    | 5984   | 10723     | solute carrier family 12 member 7                                      | 0,67  | 3,24    | 2,15 | 0,040   |
| SEPT10     | 4131   | 151011    | septin 10                                                              | 0,66  | 1,34    | 2,76 | 0,010   |
| INTS5      | 3285   | 80789     | integrator complex subunit 5                                           | 0,65  | 2,68    | 3,16 | 0,0036  |
| C3orf18    | 3248   | 51161     | chromosome 3 open reading frame 18                                     | 0,63  | 2,47    | 3,31 | 0,0024  |
| B4GALT7    | 4927   | 11285     | beta-1,4-galactosyltransferase 7                                       | 0,62  | 2,42    | 2,14 | 0,040   |
| MORN1      | 11337  | 79906     | MORN repeat containing 1                                               | 0,61  | 1,30    | 2,44 | 0,021   |
| NCKIPSD    | 3431   | 51517     | NCK interacting protein with SH3 domain                                | 0,60  | 1,62    | 2,47 | 0,019   |
| BANF1      | 1645   | 8815      | barrier to autointegration factor 1                                    | 0,60  | 1,34    | 2,24 | 0,033   |
| ANO8       | 4979   | 57719     | anoctamin 8                                                            | 0,60  | 1,44    | 2,27 | 0,031   |
| DEXI       | 1722   | 28955     | Dexi homolog                                                           | 0,59  | 1,75    | 2,85 | 0,0079  |

|            |       |           |                                                           |       |      |       |        |
|------------|-------|-----------|-----------------------------------------------------------|-------|------|-------|--------|
| PDK2       | 5481  | 5164      | pyruvate dehydrogenase kinase 2                           | 0,59  | 2,44 | 2,66  | 0,012  |
| NEB        | 30567 | 4703      | nebulin                                                   | -0,62 | 3,65 | -2,10 | 0,044  |
| TIAM2      | 11532 | 26230     | T cell lymphoma invasion and metastasis 2                 | -0,62 | 4,07 | -2,17 | 0,038  |
| PLK2       | 4768  | 10769     | polo like kinase 2                                        | -0,63 | 0,88 | -2,19 | 0,036  |
| KIAA1324L  | 8115  | 222223    | KIAA1324 like                                             | -0,64 | 3,70 | -2,67 | 0,012  |
| C7orf25    | 3248  | 79020     | chromosome 7 open reading frame 25                        | -0,66 | 1,11 | -2,33 | 0,027  |
| CCDC144B   | 9762  | 284047    | coiled-coil domain containing 144B (pseudogene)           | -0,67 | 3,38 | -2,08 | 0,046  |
| TPST1      | 2871  | 8460      | tyrosylprotein sulfotransferase 1                         | -0,70 | 3,30 | -3,12 | 0,0040 |
| FSIP2      | 23761 | 401024    | fibrous sheath interacting protein 2                      | -0,70 | 1,27 | -2,05 | 0,049  |
| DSC1       | 4271  | 1823      | desmocollin 1                                             | -0,70 | 2,68 | -2,29 | 0,029  |
| IL18RAP    | 2966  | 8807      | interleukin 18 receptor accessory protein                 | -0,70 | 6,90 | -2,20 | 0,035  |
| LRRRC37A2  | 6756  | 474170    | leucine rich repeat containing 37 member A2               | -0,74 | 2,20 | -2,92 | 0,007  |
| KLRF1      | 1260  | 51348     | killer cell lectin like receptor F1                       | -0,76 | 4,65 | -2,10 | 0,044  |
| GZMB       | 1411  | 3002      | granzyme B                                                | -0,77 | 5,26 | -2,60 | 0,014  |
| APOLD1     | 7243  | 81575     | apolipoprotein L domain containing 1                      | -0,78 | 1,72 | -2,27 | 0,030  |
| SMC1B      | 4253  | 27127     | structural maintenance of chromosomes 1B                  | -0,79 | 1,27 | -2,10 | 0,044  |
| FAT4       | 16439 | 79633     | FAT atypical cadherin 4                                   | -0,83 | 1,48 | -2,42 | 0,022  |
| RGS1       | 4117  | 5996      | regulator of G protein signaling 1                        | -0,87 | 2,31 | -3,11 | 0,004  |
| HLA-DQB1   | 4904  | 3119      | major histocompatibility complex, class II, DQ beta 1     | -0,87 | 6,17 | -2,27 | 0,030  |
| CNTNAP3    | 9521  | 79937     | contactin associated protein like 3                       | -0,90 | 4,00 | -2,23 | 0,033  |
| ABCA13     | 19074 | 154664    | ATP binding cassette subfamily A member 13                | -0,91 | 3,63 | -2,49 | 0,019  |
| RNASE2     | 755   | 6036      | ribonuclease A family member 2                            | -0,92 | 3,72 | -2,20 | 0,036  |
| SLC16A14   | 4946  | 151473    | solute carrier family 16 member 14                        | -1,04 | 0,68 | -2,55 | 0,016  |
| EREG       | 5717  | 2069      | epiregulin                                                | -1,11 | 1,69 | -2,54 | 0,016  |
| MYZAP      | 2561  | 100820829 | myocardial zonula adherens protein                        | -1,12 | 1,63 | -2,36 | 0,025  |
| KANSL1-AS1 | 976   | 644246    | KANSL1 antisense RNA 1                                    | -1,26 | 1,60 | -3,21 | 0,003  |
| GSTM3      | 4750  | 2947      | glutathione S-transferase mu 3                            | -1,30 | 1,90 | -2,42 | 0,022  |
| DAAM2      | 12955 | 23500     | dishevelled associated activator of morphogenesis 2       | -1,31 | 0,69 | -2,73 | 0,010  |
| HLA-J      | 1946  | 3137      | major histocompatibility complex, class I, J (pseudogene) | -1,33 | 4,39 | -2,14 | 0,040  |
